# Supplementary material for: Humanized Anti-CD19 CAR-T Cell Therapy and Sequential Allogeneic Hematopoietic Stem Cell Transplantation Achieved Long-Term Survival in Refractory and Relapsed B Lymphocytic Leukemia: A Retrospective Study of CAR-T Cell Therapy
Source: Front Immunol. 2021 Oct 29;12:755549. doi: 10.3389/fimmu.2021.755549 (PMC8586453; doi:10.3389/fimmu.2021.755549)
Supplement: Supplementary file 2 [file Table_1.xlsx]

## Sheet: Sheet1
Patients No.	Group	Age	Gender	Ph (Y/N)	Complex karyotype (Y/N)	Number of previous therapies	Number of relapses	Bone marrow blasts	MRD(%)	Transduction efficiency of T cells (%)	CAR-T cells infused (×106/kg)	Volumn of CAR-T cells	Time since last chemistry	OS	Status (1=death, 0=the censored or survival)	LFS	status(1=progress, 0=no progress)	Overall response; NA=not asseseable,CR=complete remission,MRD+=MRD positive,MRD-=MRD negative	Days of CRS occurrance	IL-6 max	Ferritin max	CRS grade(the first infusion)	Glucocorticoids;(Y/N)	Tocilizumab;(Y/N)	Neurotoxicity	Relapsed days(after first infusion)	CRS grade(reinfusion)	Response(reinfusion)	Relapsed days(Reinfusion)	GVHD grade	Days of gvhd occurance	Days of neutrophil engraftment	Days of platelet engraftment	Response(afer HSCT)
1	CART1	39	male	N	N	12	3	18	7	66	1	50	25	14	1	0	1	NA	9	880	2000	5	Y	N	N	/	/	/	/	/	/	/	/	/
2	CART1	57	female	N	N	16	1	0	49.2844	30	1	50	148	618	1	429	1	CR, MRD-	3	129	919	1	N	N	N	429	/	/	/	/	/	/	/	/
3	CART1	11	female	N	N	13	1	92	76.35	63	1	50	76	395	1	30	1	CR, MRD-	8	286	76301	2	N	N	N	30	/	/	/	/	/	/	/	/
4	CART1	33	female	N	N	2	/	45	29.665	35	1	50	179	103	1	0	1	NR	9	112	63125	1	N	N	N	/	/	/	/	/	/	/	/	/
5	CART1	39	female	Y	N	6	1	15	27.9428	29	1	50	146	85	1	0	1	NR	2	62	1429	1	N	N	N	/	/	/	/	/	/	/	/	/
6	CART1	14	male	N	Y	3	1	29	30.784	23	1	50	77	454	1	449	1	CR, MRD-	20	9.97	145	1	N	N	N	449	/	/	/	/	/	/	/	/
7	CART1	23	female	N	N	3	/	0	0.1108	20	1	100	77	236	1	149	1	CR, MRD+	6	118.6	833.4	4	Y	Y	N	149	/	/	/	/	/	/	/	/
8	CART1	5	female	Y	N	6	3	36	17.7053	21	1	100	41	55	1	45	1	CR, MRD-	5	5000	9937	4	N	Y	N	45	/	/	/	/	/	/	/	/
9	CART1	70	female	N	N	2	1	11	2.3571	20	1	100	224	329	1	35	1	CR, MRD-	9	66.5	706.1	2	0	Y	N	35	/	/	/	/	/	/	/	/
10	CART1	40	female	N	N	5	3	75	96.9932	30	1	100	98	24	1	24	0	CR, MRD-	3	5000	26225	4	Y	Y	N	/	/	/	/	/	/	/	/	/
11	CART1	21	male	N	N	14	1	4	31.5	57	1	50	83	621	1	60	1	CR, MRD-	1	280	2176	1	N	N	N	60	/	/	/	/	/	/	/	/
12	CART2	8	male	N	N	7	2	82	72.21	79.8	1	20	38	248	1	131	1	CR, MRD+	5	302	2000	2	N	Y	N	131	1	/	/	/	/	/	/	/
13	CART2	6	male	N	N	9	1	42	68.7621	59.8	1	50	95	324	1	92	1	CR, MRD+	9	23.95	2000	1	N	N	N	92	1	CR	90	/	/	/	/	/
14	CART2	7	female	N	N	17	1	86	24.16	65	1	50	48	514	1	168	1	CR, MRD+	0	12	13509	1	N	N	N	168	1	CR	38	/	/	/	/	/
15	CART2	68	female	Y	N	2	/	95	36.7	16	1	100	35	347	1	189	1	CR, MRD-	5	293.4	6559	1	N	N	N	189	1	/	/	/	/	/	/	/
16	CART2	68	female	N	N	2	1	2	10	25	1	100	78	842	1	544	1	CR, MRD-	5	517	1437	1	N	N	N	544	1	/	/	/	/	/	/	/
17	CART2	53	male	N	N	3	1	0	37.08	18.8	1	50	65	1147	1	719	1	CR, MRD-	9	5.13	1031	1	N	N	N	719	1	/	/	/	/	/	/	/
18	CART2	7	male	N	N	11	1	0	10.42	85.8	1	30	225	482	1	366	1	CR, MRD+	/	192	5694	0	N	N	N	366	1	CR	120	/	/	/	/	/
19	HSCT	20	male	N	Y	3	1	80	71.85	80.7	1	50	27	105	1	69	1	CR, MRD-	3	194.7	9985	3	N	Y	N	69	/	/	/	IV	40	20	20	CR
20	HSCT	6	male	N	N	2	/	18	13.3	65	1	50	35	1457	0	1443	0	CR, MRD-	8	660	1578	2	N	N	N	/	/	/	/	0	/	15	14	CR
21	HSCT	15	female	N	N	2	1	16	18.1	24.5	1	50	36	1315	0	1298	0	CR, MRD-	12	180.4	2000	1	N	N	N	/	/	/	/	0	/	13	12	CR
22	HSCT	9	male	N	N	8	2	0	0.03	50	1	50	26	1240	0	1240	0	CR, MRD-	6	6	105.7	1	N	N	N	/	/	/	/	0	/	25	34	CR
23	HSCT	26	male	N	N	11	1	78	65.6	31	1	50	87	541	1	504	1	CR, MRD-	8	84.23	67385	2	N	Y	N	504	/	/	/	0	/	16	20	CR
24	HSCT	41	female	Y	N	7	1	86	24.43	70	1	50	114	105	1	64	1	CR, MRD-	1	2366	24083	3	Y	Y	N	64	/	/	/	0	/	21	33	CR
25	HSCT	17	female	N	N	5	1	12	49.65	35	1	100	48	736	0	736	0	CR, MRD-	3	5000	14902	4	N	Y	Y	/	/	/	/	I	45	14	12	CR
26	HSCT	22	male	N	Y	3	2	0	0.167	21	1	100	105	580	0	580	0	CR, MRD-	8	30.87	3128	1	N	N	N	/	/	/	/	III	26	14	15	CR
27	HSCT	54	female	Y	N	7	1	0	0.408	45	1	100	1013	232	1	232	0	CR, MRD-	8	6.11	735.6	3	N	N	N	/	/	/	/	0	/	20	15	CR
28	HSCT	12	female	N	N	2	1	0	0.803	36	1	100	62	379	0	379	0	CR, MRD-	6	16	152.6	1	Y	Y	N	/	/	/	/	0	/	11	36	CR
